# Supplementary material for: Beyond direct neighbourhood effects: higher-order interactions improve modelling and predicting tree survival and growth
Source: PubMed Central journal article supplement (PMC8288344; doi:10.1093/nsr/nwaa244), 2020-09-23
Supplement: nwaa244_supplemental_file.pdf [file nwaa244_supplemental_file.pdf]

## 1 Supporting Information

### 2 Appendix S1 Categorising neighbours as large and small trees

3 In the main text, the neighbours of a focal tree were categorised by species identity (*Fagus*  
4 *sylvatica* and *Picea abies*) and assumed that different neighbours had different direct and higher-  
5 order effects on focal trees. We also categorised neighbours as large trees ( $DBH > 10$  cm) and  
6 small trees ( $DBH \leq 10$  cm) to see these direct and higher-order interactions are mainly from  
7 many small trees or from few large trees (Fig. S3). The spatial distribution of large (L) and small  
8 trees (S) within the 25-ha Zofin Forest Dynamic Plot (ZFDP) were displayed in Fig. S4. For  $N$   
9 individuals ( $N = N_L + N_S$ ,  $N_L$  is number of large trees and  $N_S$  is number of small trees) around a  
10 focal tree ( $i_m$ , individual  $m$  of species  $i$ ), their direct effects on  $i_m$  ( $DI_{i_m} | [N]$ ) can be classified into  
11 direct effects of large trees ( $DI_{iL}$ ) and small trees ( $DI_{iS}$ ) on the focal tree of species  $i$ :

$$12 \quad DI_{i_m} | [N] = DI_{iL} + DI_{iS} = \alpha_{iL} \cdot \left( \sum_{p=1}^{N_L} \frac{DBH_{L_p}^u}{d[i_m, L_p]^v} \right) + \alpha_{iS} \cdot \left( \sum_{p=1}^{N_S} \frac{DBH_{S_p}^u}{d[i_m, S_p]^v} \right)$$

13 The higher-order effects of the  $N$  neighbours on  $i_m$  ( $HOI_{i_m} | [N]$ ) can be classified into higher-  
14 order effects of large trees on focal tree in the presence of other large trees ( $HOI_{iL,L}$ ), higher-  
15 order effects of large trees on focal tree in the presence of small trees ( $HOI_{iL,S}$ ), higher-order  
16 effects of small trees on focal tree in the presence of large trees ( $HOI_{iS,L}$ ), higher-order effects of  
17 small trees on focal tree in the presence other small trees ( $HOI_{iS,S}$ ):

$$18 \quad HOI_{i_m} | [N] = HOI_{iL,L} + HOI_{iL,S} + HOI_{iS,L} + HOI_{iS,S}$$
$$= \beta_{iL,L} \cdot \left( \sum_{p=1}^{N_L} \sum_{q=1}^{N_L} \frac{DBH_{L_p}^u}{d[i_m, L_p]^v} \cdot \frac{DBH_{L_q}^u}{d[L_p, L_q]^v} \right) + \beta_{iL,S} \cdot \left( \sum_{p=1}^{N_L} \sum_{q=1}^{N_S} \frac{DBH_{L_p}^u}{d[i_m, L_p]^v} \cdot \frac{DBH_{S_q}^u}{d[L_p, S_q]^v} \right)$$
$$+ \beta_{iS,L} \cdot \left( \sum_{p=1}^{N_S} \sum_{q=1}^{N_L} \frac{DBH_{S_p}^u}{d[i_m, S_p]^v} \cdot \frac{DBH_{L_q}^u}{d[S_p, L_q]^v} \right) + \beta_{iS,S} \cdot \left( \sum_{p=1}^{N_S} \sum_{q=1}^{N_S} \frac{DBH_{S_p}^u}{d[i_m, S_p]^v} \cdot \frac{DBH_{S_q}^u}{d[S_p, S_q]^v} \right)$$

19 The following analyses were conducted following the methods in the main text and the results  
20 were displayed in Table S2 and Fig. S5.

21

22 **Table S1** The optimum tree size ( $u$ ) and distance ( $v$ ) parameters at which the size and direct  
23 interactions models (SIZE+DI) and the HOIs-inclusive models (SIZE+DI+HOI) in 441  
24 combinations of 21 size shape parameter values ( $u = 0, 0.1, 0.2, \dots, 2$ ) and 21 distance shape  
25 parameter values ( $v = 0, 0.1, 0.2, \dots, 2$ ) had highest R-squared and likelihood for the survival and  
26 growth of Beech (*Fagus sylvatica*) and Spruce (*Picea abies*) in each maximum radius case ( $R =$   
27 10 m, 20 m and 30 m). McFadden pseudo-R-squared was given for logistic regressions of  
28 survival models.

29

| Radius | Species | Response | Models      | R-squared_u | R-squared_v | R-squared | logLik_u | logLik_v | logLik |
|--------|---------|----------|-------------|-------------|-------------|-----------|----------|----------|--------|
| 10 m   | FS      | survival | SIZE+DI     | 1.2         | 0.3         | 0.009     | 1.2      | 0.3      | -2246  |
|        |         |          | SIZE+DI+HOI | 0.6         | 0.3         | 0.041     | 0.6      | 0.3      | -2173  |
|        |         | growth   | SIZE+DI     | 1.1         | 0.6         | 0.230     | 1.1      | 0.6      | -42331 |
|        |         |          | SIZE+DI+HOI | 0.9         | 0.7         | 0.238     | 0.9      | 0.7      | -42148 |
|        | PA      | survival | SIZE+DI     | 1.1         | 0.3         | 0.189     | 1.1      | 0.3      | -227   |
|        |         |          | SIZE+DI+HOI | 0.8         | 0.0         | 0.222     | 0.8      | 0.0      | -218   |
|        |         | growth   | SIZE+DI     | 0.8         | 0.8         | 0.342     | 0.8      | 0.8      | -967   |
|        |         |          | SIZE+DI+HOI | 0.8         | 0.7         | 0.355     | 0.8      | 0.7      | -959   |
| 20 m   | FS      | survival | SIZE+DI     | 0.2         | 0.0         | 0.028     | 0.2      | 0.0      | -1409  |
|        |         |          | SIZE+DI+HOI | 0.5         | 0.8         | 0.062     | 0.5      | 0.8      | -1360  |
|        |         | growth   | SIZE+DI     | 1.3         | 0.8         | 0.244     | 1.3      | 0.8      | -34611 |
|        |         |          | SIZE+DI+HOI | 1.0         | 0.8         | 0.252     | 1.0      | 0.8      | -34443 |
|        | PA      | survival | SIZE+DI     | 1.0         | 0.5         | 0.219     | 1.0      | 0.5      | -207   |
|        |         |          | SIZE+DI+HOI | 0.5         | 0.2         | 0.276     | 0.5      | 0.2      | -192   |
|        |         | growth   | SIZE+DI     | 0.9         | 1.0         | 0.345     | 0.9      | 1.0      | -890   |
|        |         |          | SIZE+DI+HOI | 1.0         | 0.9         | 0.361     | 1.0      | 0.9      | -881   |
| 30 m   | FS      | survival | SIZE+DI     | 0.2         | 0.0         | 0.036     | 0.2      | 0.0      | -1038  |
|        |         |          | SIZE+DI+HOI | 0.4         | 0.9         | 0.067     | 0.4      | 0.9      | -1005  |
|        |         | growth   | SIZE+DI     | 1.4         | 0.9         | 0.247     | 1.4      | 0.9      | -27901 |
|        |         |          | SIZE+DI+HOI | 1.0         | 0.9         | 0.260     | 1.0      | 0.9      | -27703 |
|        | PA      | survival | SIZE+DI     | 2.0         | 0.4         | 0.262     | 2.0      | 0.4      | -115   |
|        |         |          | SIZE+DI+HOI | 0.7         | 0.9         | 0.302     | 0.7      | 0.9      | -109   |
|        |         | growth   | SIZE+DI     | 0.9         | 1.1         | 0.316     | 0.9      | 1.1      | -686   |
|        |         |          | SIZE+DI+HOI | 1.0         | 1.0         | 0.336     | 1.0      | 1.0      | -678   |

31 **Table S2 Evaluations of model performance based on the parsimony tests and repeated k-**  
32 **fold cross validations (10 folds and 10 repeats) in case of optimum  $u$  and  $v$  and Radius = 10**  
33 **m.** Optimum  $u$  and  $v$  were selected for models with the highest R-squared and likelihood (Table  
34 S1). For the parsimony tests, AIC (Akaike's Information Criteria) and BIC (Bayesian  
35 Information Criteria) that were two or more points less than the next best model were considered  
36 as a meaningful improvement in in-sample performance. Models with lower RMSE (root mean  
37 square error) and MAE (mean absolute error) computed from cross validations had better out-of-  
38 sample performance. The numbers in bold indicated that HOIs-inclusive models had best  
39 performance based on AIC, BIC, RMSE or MAE.  
40

| Radius  | Species | Response | Model       | $u$ | $v$ | Para  | Samples | R <sup>2</sup> | Loglik        | AIC          | BIC          | RMSE         | MAE          |
|---------|---------|----------|-------------|-----|-----|-------|---------|----------------|---------------|--------------|--------------|--------------|--------------|
| 10 m    | Beech   | Survival | SIZE        | -   | -   | 4     | 47560   | 0.007          | -2250         | 4508         | 4543         | 0.090        | 0.016        |
|         |         |          | SIZE+DI     | 1.2 | 0.3 | 6     | 47560   | 0.009          | -2246         | 4504         | 4557         | 0.090        | 0.016        |
|         |         |          | SIZE+DI+HOI | 0.6 | 0.3 | 10    | 47560   | <b>0.041</b>   | <b>-2173</b>  | <b>4367</b>  | <b>4454</b>  | <b>0.090</b> | <b>0.016</b> |
|         |         | Growth   | SIZE        | -   | -   | 2     | 35307   | 0.179          | -43458        | 86923        | 86948        | 0.829        | 0.664        |
|         |         |          | SIZE+DI     | 1.1 | 0.6 | 4     | 35307   | 0.230          | -42331        | 84671        | 84714        | 0.803        | 0.641        |
|         |         |          | SIZE+DI+HOI | 0.9 | 0.7 | 8     | 35307   | <b>0.238</b>   | <b>-42148</b> | <b>84314</b> | <b>84390</b> | <b>0.799</b> | <b>0.638</b> |
|         | Spruce  | Survival | SIZE        | -   | -   | 4     | 1148    | 0.079          | -258          | 523          | 544          | 0.241        | 0.118        |
|         |         |          | SIZE+DI     | 1.1 | 0.3 | 6     | 1148    | 0.189          | -227          | 466          | 496          | 0.231        | 0.109        |
|         |         |          | SIZE+DI+HOI | 0.8 | 0   | 10    | 1148    | <b>0.222</b>   | <b>-218</b>   | <b>455</b>   | 506          | <b>0.228</b> | <b>0.106</b> |
|         |         | Growth   | SIZE        | -   | -   | 2     | 753     | 0.193          | -1043         | 2093         | 2107         | 0.966        | 0.778        |
| SIZE+DI | 0.8     |          | 0.8         | 4   | 753 | 0.342 | -967    | 1943           | 1966          | 0.874        | 0.693        |              |              |
|         |         |          | SIZE+DI+HOI | 0.8 | 0.7 | 8     | 753     | <b>0.355</b>   | <b>-959</b>   | <b>1936</b>  | 1978         | <b>0.870</b> | <b>0.691</b> |

41

42 **Table S3 Evaluations of model performance based on the parsimony tests and repeated k-**  
43 **fold cross validations (10 folds and 10 repeats) in case of optimum  $u$  and  $v$  and Radius = 30**  
44 **m.** Optimum  $u$  and  $v$  were selected for models with the highest R-squared and likelihood (Table  
45 S1). For the parsimony tests, AIC (Akaike's Information Criteria) and BIC (Bayesian  
46 Information Criteria) that were two or more points less than the next best model were considered  
47 as a meaningful improvement in in-sample performance. Models with lower RMSE (root mean  
48 square error) and MAE (mean absolute error) computed from cross validations had better out-of-  
49 sample performance. The numbers in bold indicated that HOIs-inclusive models had best  
50 performance based on AIC, BIC, RMSE or MAE.  
51

| Radius | Species     | Response | Model       | $u$ | $v$ | Para         | Samples     | R <sup>2</sup> | Loglik        | AIC          | BIC          | RMSE         | MAE          |
|--------|-------------|----------|-------------|-----|-----|--------------|-------------|----------------|---------------|--------------|--------------|--------------|--------------|
| 30 m   | Beech       | Survival | SIZE        | -   | -   | 4            | 31246       | 0.013          | -1062         | 2133         | 2166         | 0.074        | 0.011        |
|        |             |          | SIZE+DI     | 0.2 | 0   | 6            | 31246       | 0.036          | -1038         | 2089         | 2139         | 0.074        | 0.011        |
|        |             |          | SIZE+DI+HOI | 0.4 | 0.9 | 10           | 31246       | <b>0.067</b>   | <b>-1005</b>  | <b>2029</b>  | <b>2113</b>  | <b>0.074</b> | <b>0.011</b> |
|        |             | Growth   | SIZE        | -   | -   | 2            | 23245       | 0.182          | -28875        | 57756        | 57780        | 0.838        | 0.673        |
|        |             |          | SIZE+DI     | 1.4 | 0.9 | 4            | 23245       | 0.247          | -27901        | 55813        | 55853        | 0.804        | 0.641        |
|        |             |          | SIZE+DI+HOI | 1   | 0.9 | 8            | 23245       | <b>0.260</b>   | <b>-27703</b> | <b>55425</b> | <b>55497</b> | <b>0.797</b> | <b>0.635</b> |
|        | Spruce      | Survival | SIZE        | -   | -   | 4            | 806         | 0.087          | -143          | 293          | 312          | 0.204        | 0.088        |
|        |             |          | SIZE+DI     | 2   | 0.4 | 6            | 806         | 0.262          | -115          | 242          | 270          | 0.195        | 0.079        |
|        |             | Growth   | SIZE+DI+HOI | 0.7 | 0.9 | 10           | 806         | <b>0.302</b>   | <b>-109</b>   | <b>238</b>   | 285          | <b>0.194</b> | <b>0.076</b> |
|        |             |          | SIZE        | -   | -   | 2            | 535         | 0.181          | -734          | 1474         | 1487         | 0.954        | 0.763        |
| Growth | SIZE+DI     | 0.9      | 1.1         | 4   | 535 | 0.316        | -686        | 1382           | 1403          | 0.875        | 0.686        |              |              |
|        | SIZE+DI+HOI | 1        | 1           | 8   | 535 | <b>0.336</b> | <b>-678</b> | <b>1374</b>    | 1413          | <b>0.869</b> | <b>0.684</b> |              |              |

53 **Table S4 Evaluations of model performance based on the parsimony tests and repeated k-**  
54 **fold cross validations (10 folds and 10 repeats) in case of optimum  $u$  and  $v$  and Radius = 20**  
55 **m** when categorizing neighbours as large trees ( $DBH > 10$  cm) and small trees ( $DBH \leq 10$  cm).  
56 Optimum  $u$  and  $v$  were selected for models with the highest R-squared and likelihood (Table S1).  
57 For the parsimony tests, AIC (Akaike's Information Criteria) and BIC (Bayesian Information  
58 Criteria) that were two or more points less than the next best model were considered as a  
59 meaningful improvement in in-sample performance. Models with lower RMSE (root mean  
60 square error) and MAE (mean absolute error) computed from cross validations had better out-of-  
61 sample performance. The numbers in bold indicated that HOIs-inclusive models had best  
62 performance based on AIC, BIC, RMSE or MAE.  
63

| Radius | Species     | Response | Model       | $u$ | $v$ | Para         | Samples     | R <sup>2</sup> | Loglik        | AIC          | BIC          | RMSE         | MAE          |
|--------|-------------|----------|-------------|-----|-----|--------------|-------------|----------------|---------------|--------------|--------------|--------------|--------------|
| 20 m   | Beech       | Survival | SIZE        | -   | -   | 4            | 38798       | 0.011          | -1433         | 2874         | 2908         | 0.078        | 0.012        |
|        |             |          | SIZE+DI     | 0.8 | 0.0 | 6            | 38798       | 0.029          | -1408         | 2827         | 2878         | 0.078        | 0.012        |
|        |             |          | SIZE+DI+HOI | 0.5 | 0.7 | 10           | 38798       | <b>0.067</b>   | <b>-1352</b>  | <b>2724</b>  | <b>2809</b>  | <b>0.078</b> | <b>0.012</b> |
|        |             | Growth   | SIZE        | -   | -   | 2            | 28845       | 0.180          | -35775        | 71557        | 71582        | 0.836        | 0.671        |
|        |             |          | SIZE+DI     | 1.5 | 0.8 | 4            | 28845       | 0.244          | -34611        | 69231        | 69273        | 0.803        | 0.640        |
|        |             |          | SIZE+DI+HOI | 1.5 | 0.8 | 8            | 28845       | <b>0.267</b>   | <b>-34156</b> | <b>68330</b> | <b>68405</b> | <b>0.791</b> | <b>0.630</b> |
|        | Spruce      | Survival | SIZE        | -   | -   | 4            | 1058        | 0.099          | -239          | 486          | 506          | 0.244        | 0.121        |
|        |             |          | SIZE+DI     | 1.2 | 0.4 | 6            | 1058        | 0.212          | -209          | 431          | 461          | 0.232        | 0.110        |
|        |             | Growth   | SIZE+DI+HOI | 1.3 | 0.4 | 10           | 1058        | <b>0.305</b>   | <b>-185</b>   | <b>389</b>   | <b>439</b>   | <b>0.230</b> | <b>0.105</b> |
|        |             |          | SIZE        | -   | -   | 2            | 692         | 0.181          | -967          | 1941         | 1954         | 0.979        | 0.787        |
| Growth | SIZE+DI     | 1.0      | 1.1         | 4   | 692 | 0.308        | -909        | 1828           | 1851          | 0.902        | 0.711        |              |              |
|        | SIZE+DI+HOI | 1.4      | 0.9         | 8   | 692 | <b>0.336</b> | <b>-894</b> | <b>1807</b>    | <b>1848</b>   | <b>0.889</b> | <b>0.710</b> |              |              |

65 **Figure S1** The spatial distribution of *Fagus sylvatica* (Beech, red) and *Picea abies* (Spruce, blue)  
66 within the 25-ha Zofin plot.



67  
68  
69  
70  
71

72 **Figure S2** Neighbourhood direct (DI) and higher-order effects (HOI) decay as a function of  
73 distance. The shapes of the curves are determined by  $\nu$  (ranging from 0 to 1) and are truncated at  
74 the maximum radius ( $R = 30$  m).



75  
76  
77  
78  
79  
80  
81

82 **Figure S3** The *DBH* distribution of *Fagus sylvatica* (Beech) and *Picea abies* (Spruce). Vertical  
83 red line indicates the threshold (*DBH* = 10 cm) used to categorise neighbours into large trees and  
84 small trees. Small trees constitute the majority (90% for Beech and 66% for Spruce) of both  
85 species.

86



87

88

89

90 **Figure S4** The spatial distribution of large trees (L,  $DBH > 10$  cm, red) and small trees (S,  $DBH$   
91  $\leq 10$  cm, blue) within the 25-ha Zofin plot.

92



93

94

95 **Figure S5**

96 Cumulative (purple), direct (red) and higher-order (blue) effects of on the survival (a and c) and  
97 growth (b and d) of each focal tree of *Fagus sylvatica* (Beech, a and b) and *Picea abies* (Spruce,  
98 c and d) when categorizing neighbours as large trees ( $DBH > 10$  cm) and small trees ( $DBH \leq 10$   
99 cm). Total indicates cumulative effects of all neighbours including both direct and higher-order  
100 effects. DI includes the direct effects of all neighbours including direct effects of large trees  
101 ( $DI_{iL}$ ) and direct effects of small trees ( $DI_{iS}$ ). HOI includes higher-order effects of large trees on  
102 focal tree in the presence of other large trees ( $HOI_{iL,L}$ ), higher-order effects of large trees on focal  
103 tree in the presence of small trees ( $HOI_{iL,S}$ ), higher-order effects of small trees on focal tree in the  
104 presence of large trees ( $HOI_{iS,L}$ ), and higher-order effects of small trees on focal tree in the  
105 presence other small trees ( $HOI_{iS,S}$ ). One boxplot represents the distribution of neighbourhood  
106 effects for all focal trees of a species. Boxplots above (or below zero) indicate the effects are  
107 facilitative (or competitive) for all trees of a species, while boxplots crossing the zero line  
108 indicate the effects are facilitative for some trees but competitive for others of a species.  
109



110

111
